# Supplementary figures and images for: A global view of network of lncRNAs and their binding proteins
Source: Royal Society of Chemistry journal article supplement (doi:10.1039/c4mb00409d), 2014-11-21

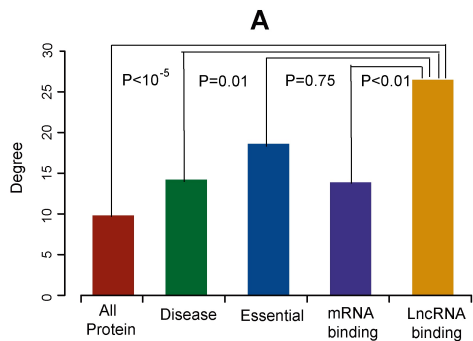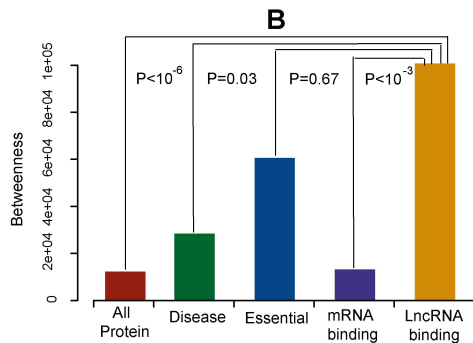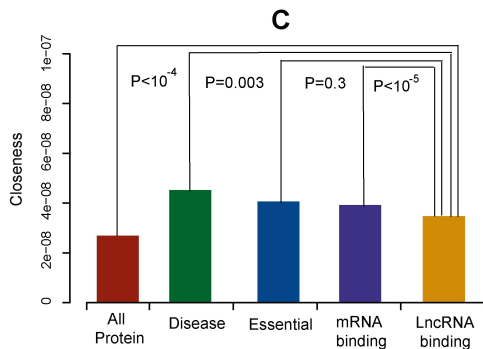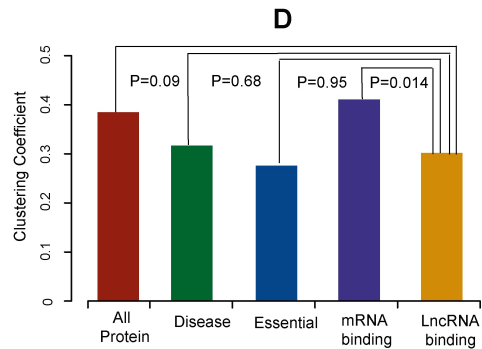

Supplement: c4mb00409d4.pdf [file c4mb00409d4.pdf]
